# Supplementary material for: Psychosocial interventions enhance HIV medication adherence: A systematic review and meta-analysis
Source: PubMed Central journal article supplement — J Health Psychol. 2018 Feb 8;25(10-11):1326–40. doi: 10.1177/1359105318755545 (PMC7480021; doi:10.1177/1359105318755545), 2018-02-08
Supplement: JHP_SupplementA.pdf [file JHP_SupplementA.pdf]

# PSYCHOSOCIAL INTERVENTIONS AND ANTIRETROVIRAL ADHERENCE

## Supplement A – Search Strategy

### Embase Search Term

(exp "Human immunodeficiency virus"/ OR exp "Human immunodeficiency virus infection"/ OR exp "Acquired immune deficiency syndrome"/ OR hiv.tw. OR aids.tw. ) AND (exp psychotherapy/ or exp "mental health services"/ or exp "self care"/ OR exp "self help"/ OR exp teletherapy/ OR exp "computer assisted therapy"/ OR psychotherap\*.tw. OR psychological-therapy.tw. OR psychological-treatment.tw. OR psychological-intervention.tw. OR counsel\*.tw. OR cbt.tw. OR behavior#r-therapy.tw. OR interpersonal-therapy.tw. OR coping.tw. OR peer-support.tw. OR social-support.tw. OR problem-solving.tw. OR stress-management.tw. OR self-help.tw. OR internet-therap\*.tw. OR online-therap\*.tw. OR psychoed\*.tw. OR training.tw. OR exposure.tw. OR relaxation.tw. OR mindfulness.tw. OR reinforcement.tw. OR risk-reduction.tw. OR commitment-therap\*.tw. OR case-manage\*.tw.) AND (exp "patient compliance"/ OR adher\*.tw. OR compliance.tw. OR exp "highly active antiretroviral therapy"/ OR exp "antiviral therapy"/ OR antiretroviral-therapy.tw.)

Filters used: Human subjects, Aged  $\geq 18$  ('Adult' and 'Aged' categories), English Language, Article, Randomized Controlled Trial or Controlled Clinical Trial, Post 1996.

### PsycInfo Search Term

(DE (hiv OR aids) OR TX (hiv OR aids)) AND (DE (psychotherapy OR psychotherapeutic techniques OR mental health programs OR Counseling OR Stress management OR case management OR self management OR Telemedicine OR Computer Assisted Therapy OR Psychoeducation) OR TX (psychotherap\* OR psychological-therap\* OR psychological-treatment OR psychological-intervention OR counsel\* OR cbt OR behavior#r-therap\* OR interpersonal-therap\* OR coping OR peer-support OR social-support OR problem-solving OR stress-manage\* OR self-help OR internet-therap\* OR online-therap\* OR psychoed\* OR training OR exposure OR relaxation OR mindfulness OR reinforcement OR risk-reduction OR commitment-therap\* OR case-manage\*)) AND (DE (treatment compliance OR antiviral drugs OR drug therapy) OR TX (adher\* OR compliance OR antiretroviral-therapy))

Filters used: Aged  $\geq 18$  (Adulthood), Article or Dissertation, Treatment Outcome/Clinical Trial or Follow-up study or Experimental Replication, Post 1996.

### **Medline Search Term**

(hiv [mesh] OR hiv infection [mesh] OR hiv [tiab] or aids [tiab]) AND (psychotherapy [mesh] OR mental health services [mesh] OR self-care [mesh] OR self-help groups [mesh] OR telemedicine [mesh] OR therapy, computer-assisted [mesh] OR psychotherap\* [tiab] OR psychological therap\* [tiab] OR psychological treatment\* [tiab] OR psychological intervention\* [tiab] OR counsel\* [tiab] OR cbt [tiab] OR behavior therap\* [tiab] OR behaviour therap\* [tiab] OR interpersonal therap\* [tiab] OR coping [tiab] OR peer support [tiab] OR social support [tiab] OR problem solving [tiab] OR stress manage\* [tiab] OR self-help [tiab] OR internet therap\* [tiab] OR online therap\* [tiab] OR psychoed\* [tiab] OR training [tiab] OR exposure [tiab] OR relaxation [tiab] OR mindfulness [tiab] OR reinforcement [tiab] OR risk reduction [tiab] OR commitment therap\* [tiab] OR case manage\* [tiab]) AND (patient compliance [mesh] OR adher\* [tiab] OR compliance [tiab] OR HAART [mesh] OR antiretroviral therapy [tiab])

Filters used: Human Subjects, English language, Controlled Clinical Trial or Randomized Controlled Trial, Post 1996.
