# Supplementary material for: Psychosocial interventions enhance HIV medication adherence: A systematic review and meta-analysis
Source: PubMed Central journal article supplement — J Health Psychol. 2018 Feb 8;25(10-11):1326–40. doi: 10.1177/1359105318755545 (PMC7480021; doi:10.1177/1359105318755545), 2018-02-08
Supplement: JHP_SupplementB.pdf [file JHP_SupplementB.pdf]

## PSYCHOSOCIAL INTERVENTIONS AND ANTIRETROVIRAL ADHERENCE

Supplement B – Summary of RCT studies on the Effect of Psychosocial Interventions on Medication Adherence in PLWH.

| <b>Study</b>                      | <b>Population</b>                                                                                    | <b>Intervention</b>                                                                                                                                        | <b>Study Design</b>                      | <b>Outcome</b>                    |
|-----------------------------------|------------------------------------------------------------------------------------------------------|------------------------------------------------------------------------------------------------------------------------------------------------------------|------------------------------------------|-----------------------------------|
| <b>First author, year</b>         | <b>Randomized sample</b>                                                                             | <b>Name</b>                                                                                                                                                | <b>Study Aim</b>                         | <b>Measure type</b>               |
| <b>Country</b>                    | <b>Mean age and % female</b>                                                                         | <b>Provider</b>                                                                                                                                            | <b>Control Group</b>                     |                                   |
|                                   | <b>Screening and risk type (when applicable)</b>                                                     | <b>Type and techniques used</b>                                                                                                                            | <b>Analysed sample (when applicable)</b> |                                   |
|                                   |                                                                                                      | <b>Duration and setting</b>                                                                                                                                |                                          |                                   |
| Basso, 2013<br>Brazil             | <i>N</i> = 121 PLWH<br>Mean age: 43 years; 37% female<br>Screened on detectable viral load (DG).     | <i>Human Right- Based Intervention</i><br>Provider: healthcare professional<br>Categorized as: counselling<br>Length: 4 hrs; Setting: individual           | Aim: increasing adherence.<br>CG: SC     | MEMS                              |
| Carrico, 2006<br>USA              | <i>N</i> = 130, male PLWH<br>Mean age: 42 years; 0% female                                           | <i>Cognitive Behavioural Stress Management</i><br>Provider: psychologist/psychiatrist<br>Categorized as: CBT (CB, REL)<br>Length: 22.5 hrs; Setting: group | Aim: improving health.<br>CG: SC         | ACTG, self-report, 4 days recall. |
| Chung, 2011<br>Kenya              | <i>N</i> = 200 PLWH<br>Mean age: 36 years; 66% female<br>Screened on initiating ART (RG)             | <i>Adherence Counselling</i><br>Provider: counsellor<br>Categorized as: counselling (CB)<br>Length: 1.9 hrs; Setting: individual                           | Aim: increasing adherence.<br>CG: SC     | Pill-Count                        |
| Claborn, 2014<br>USA              | <i>N</i> = 97 PLWH<br>Mean age: 44 years; 16% female<br>Screened on adherence $\leq$ 95% (DG)        | <i>eLifeSteps</i><br>Provider: computer<br>Categorized as: CBT (CB)<br>Length: 1 hour; Setting: individual                                                 | Aim: increasing adherence.<br>CG: SC     | ACTG, self-report, 4 days recall. |
| De Bruin, 2010<br>The Netherlands | <i>N</i> = 133 PLWH<br>Mean age: 48 years; 10% female                                                | <i>Adherence Improving Self-Management Strategy</i><br>Provider: HIV-nurse<br>Categorized as: counselling (MI)<br>Length: 1 hour; Setting: individual      | Aim: increasing adherence.<br>CG: SC     | MEMS                              |
| DiIorio, 2008<br>USA              | <i>N</i> = 247 PLWH<br>Mean age: 42 years; 28% female<br>Screened on initiating or changing ART (RG) | <i>Motivational Interviewing</i><br>Provider: HIV-nurse<br>Categorized as: counselling (MI)<br>Length: 2.8 hrs; Setting: individual                        | Aim: increasing adherence.<br>CG: SC     | MEMS                              |

| <b>Study</b>                          | <b>Population</b>                                                                                                              | <b>Intervention</b>                                                                                                                                  | <b>Study Design</b>                                                                                       | <b>Outcome</b>                    |
|---------------------------------------|--------------------------------------------------------------------------------------------------------------------------------|------------------------------------------------------------------------------------------------------------------------------------------------------|-----------------------------------------------------------------------------------------------------------|-----------------------------------|
| <b>First author, year<br/>Country</b> | <b>Randomized sample<br/>Mean age and % female<br/>Screening and risk type (when applicable)</b>                               | <b>Name<br/>Provider<br/>Type and techniques used<br/>Duration and setting</b>                                                                       | <b>Study Aim<br/>Control Group<br/>Analysed sample (when applicable)</b>                                  | <b>Measure type</b>               |
| Duncan, 2012<br>USA                   | <i>N</i> = 76 PLWH<br>Mean age: 48 years; 16% female<br>Screened on experiencing distress from side effects (RG)               | <i>"FOCUS" MBSR</i><br>Provider: MBSR (healthcare) professional<br>Categorized as: CBT (CB, REL)<br>Length: 30 hrs; Setting: group                   | Aim: improving health<br>CG: SC                                                                           | VAS, self-report, 30 days recall  |
| Goggin, 2013<br>USA                   | <i>N</i> = 135 PLWH<br>Mean age: 40.6 years; 26% female<br>Screened on adherence problems, initiating or changing ART (DG)     | <i>Motivational Interviewing - CBT</i><br>Provider: psychologist<br>Categorized as: counselling (CB, MI)<br>Length: 4.2 hrs; Setting: individual     | Aim: increasing adherence<br>CG: SC                                                                       | MEMS                              |
| Golin, 2006<br>USA                    | <i>N</i> = 155 PLWH<br>Mean age: 40 years; 34% female<br>Screened on detectable or increased viral load or initiating ART (DG) | <i>Motivational Interviewing</i><br>Provider: healthcare professional<br>Categorized as: counselling (MI)<br>Length: 2.3 hrs; Setting: individual    | Aim: increasing adherence<br>CG: Active control group: PE                                                 | MEMS                              |
| Hersch, 2013<br>USA                   | <i>N</i> = 168 PLWH<br>Mean age: 46 years; 24% female<br>Screened on detectable viral load (DG)                                | <i>eLifeSteps</i><br>Provider: computer<br>Categorized as: CBT (CB, REL)<br>Length: 1 hour; Setting: individual                                      | Aim: increasing adherence<br>CG: WLC                                                                      | MEMS                              |
| Holstad, 2011<br>USA                  | <i>N</i> = 207, female PLWH<br>Mean age: 44 years; 100% female                                                                 | <i>KHARMA – Motivational Interviewing</i><br>Provider: nurse<br>Categorized as: counselling (MI)<br>Length: 14 hrs; Setting: group                   | Aim: improving health<br>CG: Active control group: PE<br>Analysed if $\geq 7$ of 8 sessions were followed | MEMS                              |
| Holstad, 2012<br>Nigeria              | <i>N</i> = 60, female PLWH<br>Mean age: 31 years; 100% female                                                                  | <i>KHARMA – Motivational Interviewing</i><br>Provider: healthcare professional<br>Categorized as: counselling (MI)<br>Length: 14 hrs; Setting: group | Aim: improving health<br>CG: Active control group: PE<br>Analysed if $\geq 7$ of 8 sessions were followed | AGAS, self-report, 30 days recall |
| Horvath, 2013<br>USA                  | <i>N</i> = 145, gay or bisexual PLWH<br>Mean age: 43 years; 0% female<br>Screened on adherence problems (DG)                   | <i>Thrive With Me - online social support</i><br>Provider: peer<br>Categorized as: peer support<br>Length: NR; Setting: individual                   | Aim: increasing adherence<br>CG: WLC                                                                      | Self-report item, 30 days recall  |

| <b>Study</b>                          | <b>Population</b>                                                                                                | <b>Intervention</b>                                                                                                                                    | <b>Study Design</b>                                                      | <b>Outcome</b>                      |
|---------------------------------------|------------------------------------------------------------------------------------------------------------------|--------------------------------------------------------------------------------------------------------------------------------------------------------|--------------------------------------------------------------------------|-------------------------------------|
| <b>First author, year<br/>Country</b> | <b>Randomized sample<br/>Mean age and % female<br/>Screening and risk type (when applicable)</b>                 | <b>Name<br/>Provider<br/>Type and techniques used<br/>Duration and setting</b>                                                                         | <b>Study Aim<br/>Control Group<br/>Analysed sample (when applicable)</b> | <b>Measure type</b>                 |
| Ingersoll, 2011<br>USA                | <i>N</i> = 56, crack cocaine using PLWH<br>Mean age: 45 years; 52% female<br>Screened on adherence problems (DG) | <i>Motivational Interviewing</i><br>Provider: psychologist<br>Categorized as: counselling (CB, MI)<br>Length: 6 hrs; Setting: individual               | Aim: improving health<br>CG: Active control group: PE                    | TLB, self-report, 14 days recall    |
| Johnson, 2007<br>USA                  | <i>N</i> = 204 PLWH<br>Mean age: 40 years; 22% female (DG; see analysed sample)                                  | <i>The Healthy Living Project</i><br>Provider: healthcare professional.<br>Categorized as: counselling (CB)<br>Length: 22.5 hrs; Setting: individual   | Aim: improving health<br>CG: WLC<br>Analysed if $\leq$ 85% adherence     | ACTG, self-report, 3 days recall    |
| Johnson, 2011<br>USA                  | <i>N</i> = 249 PLWH<br>Mean age: 46 years; 9% female<br>Screened on side effect distress (RG)                    | <i>The Balance Project</i><br>Provider: healthcare professional.<br>Categorized as: counselling (CB)<br>Length: 5 hrs; Setting: individual             | Aim: increasing adherence<br>CG: WLC                                     | VAS, self-report, 30 days recall    |
| Kalichman, 2011<br>USA                | <i>N</i> = 41 PLWH<br>Mean age: 51 years; 35% female<br>Screened on $\leq$ 95% adherence (DG)                    | <i>Cell Phone Adherence Counselling</i><br>Provider: counsellor<br>Categorized as: counselling (CB)<br>Length: 3.75 hrs; Setting: individual           | Aim: increasing adherence<br>CG: Active control group: pill-count calls  | Pill-count                          |
| Konkle-Parker, 2012<br>USA            | <i>N</i> = 56 PLWH<br>Mean age: 35 years; 38% female<br>Screened on initiating or changing ART (RG)              | <i>Motivational Interviewing</i><br>Provider: nurse<br>Categorized as: counselling (MI)<br>Length: 2.5 hrs; Setting: individual                        | Aim: increasing adherence<br>CG: SC                                      | VAS, self-report, 21-28 days recall |
| Konkle-Parker, 2014<br>USA            | <i>N</i> = 100 PLWH<br>Mean age: 37 years; 51% female<br>Screened on adherence problems (DG)                     | <i>Motivational Interviewing</i><br>Provider: other (research coordinator)<br>Categorized as: counselling (MI)<br>Length: 2.5 hrs; Setting: individual | Aim: increasing adherence<br>CG: SC                                      | VAS, self-report, 21-28 days recall |
| Kurth 2014<br>USA                     | <i>N</i> = 240 PLWH<br>Mean age: 45 years; 9% female                                                             | <i>CARE+; online counselling</i><br>Provider: computer<br>Categorized as: counselling (MI)<br>Length: NR; Setting: individual                          | Aim: increasing adherence<br>CG: SC                                      | VAS, self-report, 30 days recall    |

| <b>Study</b>                          | <b>Population</b>                                                                                                                                            | <b>Intervention</b>                                                                                                                         | <b>Study Design</b>                                                      | <b>Outcome</b>                   |
|---------------------------------------|--------------------------------------------------------------------------------------------------------------------------------------------------------------|---------------------------------------------------------------------------------------------------------------------------------------------|--------------------------------------------------------------------------|----------------------------------|
| <b>First author, year<br/>Country</b> | <b>Randomized sample<br/>Mean age and % female<br/>Screening and risk type (when applicable)</b>                                                             | <b>Name<br/>Provider<br/>Type and techniques used<br/>Duration and setting</b>                                                              | <b>Study Aim<br/>Control Group<br/>Analysed sample (when applicable)</b> | <b>Measure type</b>              |
| Margolin, 2003<br>USA                 | <i>N</i> = 90 PLWH in a methadone maintenance program<br>Mean age: 41 years; 30% female<br>Screened on injection drug use (RG)                               | <i>HIV+ Harm Reduction Program</i><br>Provider: counsellor<br>Categorized as: CBT (CB)<br>Length: 104 hrs; Setting: group (inpatient)       | Aim: improving health<br>CG: SC                                          | TLB, self-report, 7 days recall  |
| Murphy, 2002<br>USA                   | <i>N</i> = 52 PLWH<br>Mean age: 39 years; 12% female<br>Screened on missing $\geq 1$ dose per week (DG)                                                      | <i>CBT</i><br>Provider: psychologist<br>Categorized as: CBT (CB)<br>Length: NR; Setting: group & individual                                 | Aim: increasing adherence<br>CG: SC                                      | ACTG, self-report, 3 days recall |
| Nyamathi, 2012<br>India               | <i>N</i> = 68, female PLWH, aged 18-45<br>Mean age: 31 years; 100% female<br>Screened on CD4 count $\geq 100$                                                | <i>ASHA-life</i><br>Provider: peer<br>Categorized as: peer support<br>Length: NR; Setting: group & individual                               | Aim: increasing adherence<br>CG: Active control group: PE                | Pill-Count                       |
| Parsons, 2007<br>USA                  | <i>N</i> = 143 PLWH<br>Mean age: 44 years; 21% female<br>Screened on hazardous drinking (RG)                                                                 | <i>Project PLUS – CBT and MI</i><br>Provider: healthcare professional<br>Categorized as: CBT (CB, MI)<br>Length: 8 hrs; Setting: individual | Aim: improving health<br>CG: Active control group: PE                    | Self-report item, 14 days recall |
| Rathbun, 2005<br>USA                  | <i>N</i> = 33 PLWH<br>Mean age: 38 years; 15% female<br>Screened on initiating ART (RG)                                                                      | <i>Psycho-educative counselling</i><br>Provider: healthcare professional<br>Categorized as: counselling<br>Length: NR; Setting: individual  | Aim: increasing adherence<br>CG: SC                                      | MEMS                             |
| Remien, 2005<br>USA                   | <i>N</i> = 215 PLWH in relationship with seronegative partner ( $\geq 6$ months)<br>Mean age: 42 years; 46% female<br>Screened on $\leq 80\%$ adherence (DG) | <i>SMART Couples Support Study</i><br>Provider: nurse<br>Categorized as: social support (CB)<br>Length: 3.3 hrs; Setting: individual        | Aim: increasing adherence<br>CG: SC                                      | MEMS                             |
| Reynolds, 2008<br>USA                 | <i>N</i> = 109 PLWH<br>Mean age: 37 years; 15% female<br>Screened on initiating ART (RG)                                                                     | <i>Telephone Adherence Counselling</i><br>Provider: nurse<br>Categorized as: counselling<br>Length: 1.5 hrs; Setting: individual            | Aim: increasing adherence<br>CG: SC                                      | ACTG, self-report, 4 days recall |

| <b>Study</b>                          | <b>Population</b>                                                                                          | <b>Intervention</b>                                                                                                                                  | <b>Study Design</b>                                                      | <b>Outcome</b>                    |
|---------------------------------------|------------------------------------------------------------------------------------------------------------|------------------------------------------------------------------------------------------------------------------------------------------------------|--------------------------------------------------------------------------|-----------------------------------|
| <b>First author, year<br/>Country</b> | <b>Randomized sample<br/>Mean age and % female<br/>Screening and risk type (when applicable)</b>           | <b>Name<br/>Provider<br/>Type and techniques used<br/>Duration and setting</b>                                                                       | <b>Study Aim<br/>Control Group<br/>Analysed sample (when applicable)</b> | <b>Measure type</b>               |
| Rosen, 2007<br>USA                    | <i>N</i> = 56 PLWH<br>Mean age: 44 years; 41% female<br>Screened on ≤ 80% adherence (DG)                   | <i>Contingency Management and counselling</i><br>Provider: psychologist<br>Categorized as: CBT (CB)<br>Length: NR; Setting: individual               | Aim: increasing adherence<br>CG: Active control group: counselling       | MEMS                              |
| Safren, 2001<br>USA                   | <i>N</i> = 56 PLWH<br>Mean age: 41 years; 13% female<br>Screened on adherence problems (DG)                | <i>Life-Steps: CBT for Adherence</i><br>Provider: healthcare professional<br>Categorized as: counselling (CB, MI)<br>Length: NR; Setting: individual | Aim: increasing adherence<br>CG: SC                                      | ACTG, self-report, 14 days recall |
| Safren, 2009<br>USA                   | <i>N</i> = 45 PLWH<br>Mean age: NR; 16% female<br>Screened on mood disorder (RG)                           | <i>Life-Steps: CBT for Adherence</i><br>Provider: psychologist<br>Categorized as: CBT (CB, MI, REL)<br>Length: 9.2 hrs; Setting: individual          | Aim: improving health.<br>CG: Enhanced SC                                | MEMS                              |
| Safren, 2012<br>USA                   | <i>N</i> = 89 PLWH<br>Mean age: 47 years; 39% female<br>Screened on opioid dependence & mood disorder (RG) | <i>Life-Steps: CBT for Adherence</i><br>Provider: psychologist<br>Categorized as: CBT (CB, MI, REL)<br>Length: 7.5 hrs; Setting: individual          | Aim: improving health<br>CG: Enhanced SC                                 | MEMS                              |
| Samet, 2005<br>USA                    | <i>N</i> = 151 PLWH<br>Mean age: 43 years; 46% female<br>Screened on alcohol problems (RG)                 | <i>ADHERE – Motivational Interviewing</i><br>Provider: nurse<br>Categorized as: counselling (MI)<br>Length: 2.4 hrs; Setting: individual             | Aim: increasing adherence<br>CG: SC                                      | ACTG, self-report, 30 days recall |
| Simoni, 2007<br>USA                   | <i>N</i> = 136 PLWH<br>Mean age: 43 years; 45% female                                                      | <i>Peer Support</i><br>Provider: peer<br>Categorized as: peer support<br>Length: 6 hrs; Setting: group & individual                                  | Aim: increasing adherence<br>CG: SC                                      | MEMS                              |
| Simoni, 2009<br>USA                   | <i>N</i> = 114 PLWH<br>Mean age: 40 years; 24% female<br>Screened on initiating or changing ART (RG)       | <i>Peer Support</i><br>Provider: peer<br>Categorized as: peer support<br>Length: 6 hrs; Setting: group & individual                                  | Aim: improving health<br>CG: SC                                          | MEMS                              |

| <b>Study</b>                          | <b>Population</b>                                                                                                                                          | <b>Intervention</b>                                                                                                                                | <b>Study Design</b>                                                           | <b>Outcome</b>                   |
|---------------------------------------|------------------------------------------------------------------------------------------------------------------------------------------------------------|----------------------------------------------------------------------------------------------------------------------------------------------------|-------------------------------------------------------------------------------|----------------------------------|
| <b>First author, year<br/>Country</b> | <b>Randomized sample<br/>Mean age and % female<br/>Screening and risk type (when applicable)</b>                                                           | <b>Name<br/>Provider<br/>Type and techniques used<br/>Duration and setting</b>                                                                     | <b>Study Aim<br/>Control Group<br/>Analysed sample (when applicable)</b>      | <b>Measure type</b>              |
| Simoni, 2013<br>USA                   | <i>N</i> = 40 PLWH of Mexican descent<br>Mean age: 46 years; 28% female<br>Screened on depressive complaints & non-adherence or detectable viral load (DG) | <i>CBT for Depression &amp; Life-Steps</i><br>Provider: psychologist<br>Categorized as: CBT (CB, MI, REL)<br>Length: 9.17 hrs; Setting: individual | Aim: improving health<br>CG: SC                                               | MEMS                             |
| Sorensen, 2007<br>USA                 | <i>N</i> = 66 PLWH<br>Mean age: 43 years; 41% female<br>Screened on receiving methadone treatment and ≤ 80% adherence (DG)                                 | <i>Contingency Management and Counselling</i><br>Provider: other (not specified)<br>Categorized as: CBT (CB)<br>Length: NR; Setting: individual    | Aim: increasing adherence<br>CG: Active control group: counselling and reward | MEMS                             |
| Tuldra, 2000<br>Spain                 | <i>N</i> = 116 PLWH<br>Mean age: 39 years; 24% female<br>Screened on initiating ART (RG)                                                                   | <i>Psycho-educative Counselling</i><br>Provider: psychologist<br>Categorized as: counselling<br>Length: NR; Setting: individual                    | Aim: increasing adherence<br>CG: SC                                           | Self-report item, 30 days recall |
| Wagner, 2006<br>USA                   | <i>N</i> = 230 PLWH<br>Mean age: 39 years; 20% female<br>Screened on adherence problems & initiating or changing ART (DG)                                  | <i>CBT or CBT plus Adherence Practice Trial</i><br>Provider: nurse<br>Categorized as: CBT (CB)<br>Length: 3.1 hrs; Setting: individual             | Aim: improving health<br>CG: SC                                               | MEMS                             |
| Wagner, 2013<br>USA                   | <i>N</i> = 60 PLWH<br>Mean age: 39 years; 6% female<br>Screened on initiating or changing ART (RG)                                                         | <i>Adherence Readiness Program</i><br>Provider: counsellor<br>Categorized as: counselling (CB, MI)<br>Length: 3.5 hrs; Setting: individual         | Aim: increasing adherence<br>CG: SC                                           | MEMS                             |
| Webel, 2010<br>USA                    | <i>N</i> = 89, female and transgender (identifying female), PLWH<br>Mean age: 47 years; 100% female                                                        | <i>Peer-Supported Self-management</i><br>Provider: peer<br>Categorized as: peer support (CB, REL)<br>Length: 14 hrs; Setting: group                | Aim: improving health<br>CG: WLC                                              | ACTG, self-report, 7 days recall |
| Weber, 2004<br>Switzerland            | <i>N</i> = 60 PLWH<br>Mean age: 41 years; 17% female<br>Screened on detectable viral load                                                                  | <i>CBT</i><br>Provider: psychologist<br>Categorized as: CBT (CB)                                                                                   | Aim: improving health<br>CG: SC                                               | MEMS                             |

| <b>Study</b>              | <b>Population</b>                                                                                                   | <b>Intervention</b>                                                                                                                             | <b>Study Design</b>                      | <b>Outcome</b>                   |
|---------------------------|---------------------------------------------------------------------------------------------------------------------|-------------------------------------------------------------------------------------------------------------------------------------------------|------------------------------------------|----------------------------------|
| <b>First author, year</b> | <b>Randomized sample</b>                                                                                            | <b>Name</b>                                                                                                                                     | <b>Study Aim</b>                         | <b>Measure type</b>              |
| <b>Country</b>            | <b>Mean age and % female</b>                                                                                        | <b>Provider</b>                                                                                                                                 | <b>Control Group</b>                     |                                  |
|                           | <b>Screening and risk type (when applicable)</b>                                                                    | <b>Type and techniques used</b>                                                                                                                 | <b>Analysed sample (when applicable)</b> |                                  |
|                           | (RG)                                                                                                                | <b>Duration and setting</b>                                                                                                                     |                                          |                                  |
| Williams, 2014<br>China   | <i>N</i> = 110 PLWH<br>Mean age: 38 years; 29% female<br>Screened on ≤ 90% adherence and detectable viral load (DG) | <i>Ai Sheng Nuo (Love, Life, Hope)</i><br>Provider: peer<br>Categorized as: counselling<br>Length: NR; Setting: individual                      | Aim: increasing adherence<br>CG: SC      | VAS, self-report, 30 days recall |
| Wyatt, 2004<br>USA        | <i>N</i> = 147, female, PLWH<br>Mean age: 41 years; 100% female<br>Screened on childhood sexual abuse history (RG)  | <i>ESHI: Enhanced Sexual Health Intervention</i><br>Provider: peer<br>Categorized as: counselling (CB, REL)<br>Length: 27.5 hrs; Setting: group | Aim: increasing adherence<br>CG: WLC     | Self-report item, 14 days recall |

*Note.* ACTG = AIDS Clinical Trials Group adherence questionnaire; AGAS = Antiretroviral General Adherence Scale; ART = antiretroviral therapy; CB = cognitive and/or behavioural techniques; CBT = cognitive behavioural therapy; CD4 = cluster of differentiation 4 (immune parameter); CG = control group; DG = difficulties group; IG = intervention group; MBSR = mindfulness based stress reduction; MEMS = Medication Event Monitoring System; MI = motivational interviewing techniques; NR = not reported; PE = psychoeducation; PLWH = people living with HIV; REL = relaxation techniques; RG = risk group; SC = standard care; TLB = Time-Line Back; VAS = Visual Analogue Scale; WLC = waiting-list condition.
